# Supplementary material
Source: PubMed Central journal article supplement (PMC10144618)
Supplement: web_material_kwac156.pdf [file web_material_kwac156.pdf]

## WEB MATERIAL

### Racial/Ethnic and Sex/Gender Differences in Sleep Duration Trajectories From Adolescence to Adulthood in a US National Sample

Ryan Saelee, Regine Haardörfer, Dayna A. Johnson, Julie A. Gazmararian, Shakira F. Suglia

#### Table of Contents

|                                                                                                                                                                                                                         |   |
|-------------------------------------------------------------------------------------------------------------------------------------------------------------------------------------------------------------------------|---|
| <b>Web Figure 1:</b> Flow Diagram for Sample Inclusion.....                                                                                                                                                             | 2 |
| <b>Web Figure 2.</b> Growth Mixture Model Short Sleep Duration Trajectories by Race/Ethnicity and Sex/Gender including Long Sleepers, United States, 1994-2018.....                                                     | 3 |
| <b>Web Figure 3.</b> Conceptual Model for Potential Pathways Driving Race/Ethnicity and Sex/Gender Sleep Disparities.....                                                                                               | 4 |
| <b>Web Table 1.</b> Comparison of Analytical Sample to Excluded Sample from Waves I, III, IV, and V of the National Longitudinal Study of Adolescent to Adult Health, United States, 1994-2018.....                     | 5 |
| <b>Web Table 2.</b> Growth Mixture Model Fit Indicators for Short Sleep Duration Trajectories by Race/Ethnicity and Sex/Gender, United States, 1994-2018.....                                                           | 7 |
| <b>Web Table 3.</b> Multi-Group Growth Mixture Model Results - Estimated Probabilities Across Developmental Periods for Each Trajectory Type by Race/Ethnicity and Sex/Gender, United States, 1994-2018 (n=12,593)..... | 8 |

**Web Figure 1.** Flow Diagram for Sample Inclusion.

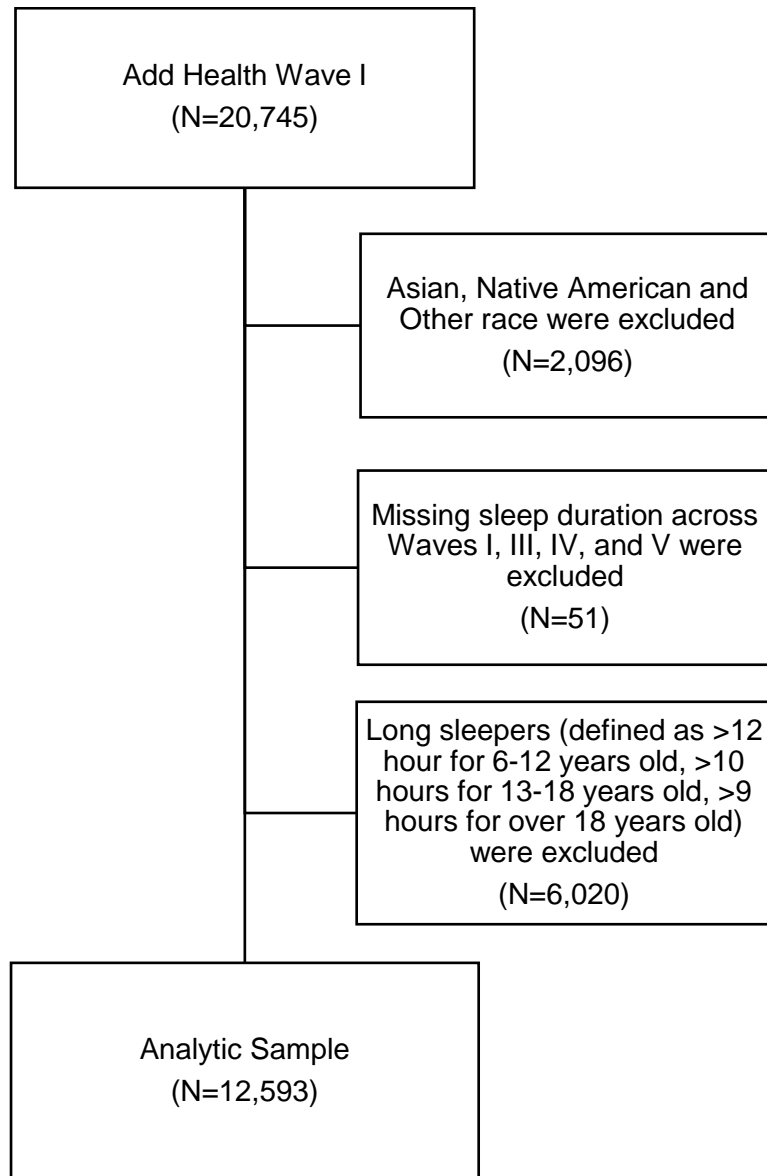

**Web Figure 2.** Growth Mixture Model Short Sleep Duration Trajectories by Race/Ethnicity and Sex/Gender including Long Sleepers, United States, 1994-2018

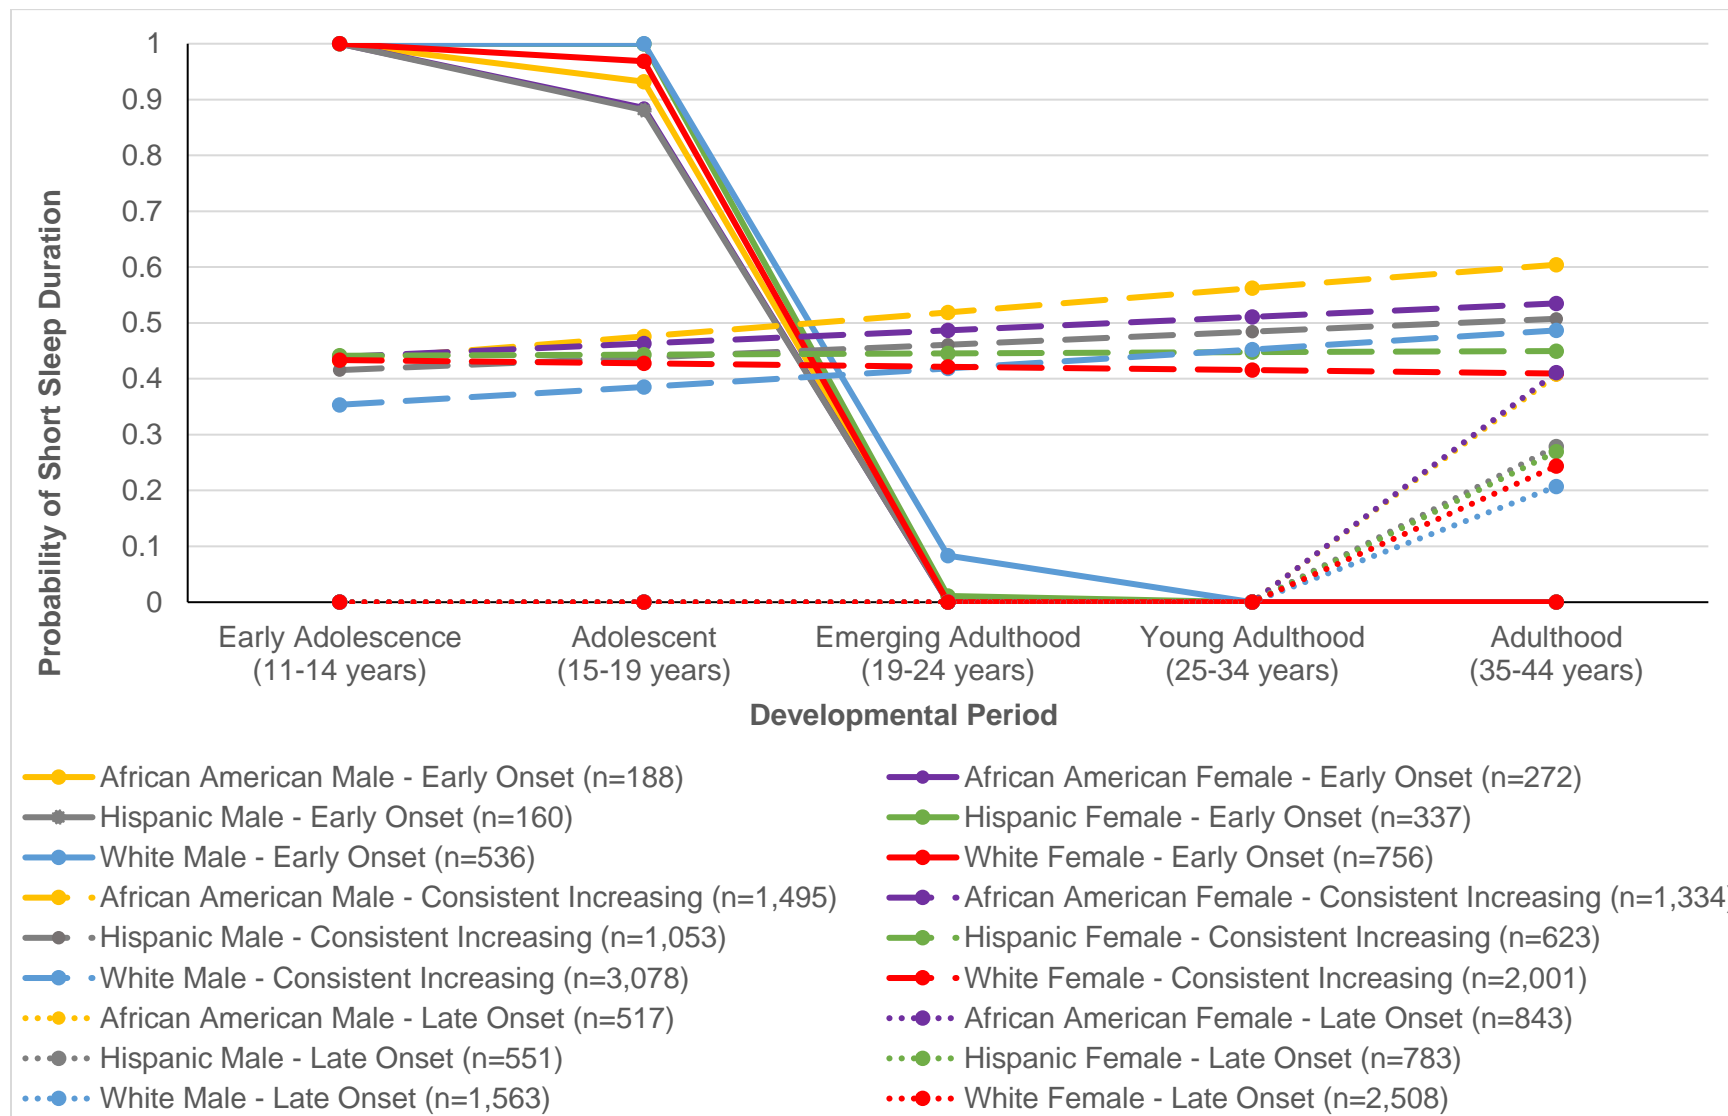

**Web Figure 3.** Conceptual Model for Potential Pathways Driving Race/Ethnicity and Sex/Gender Sleep Disparities

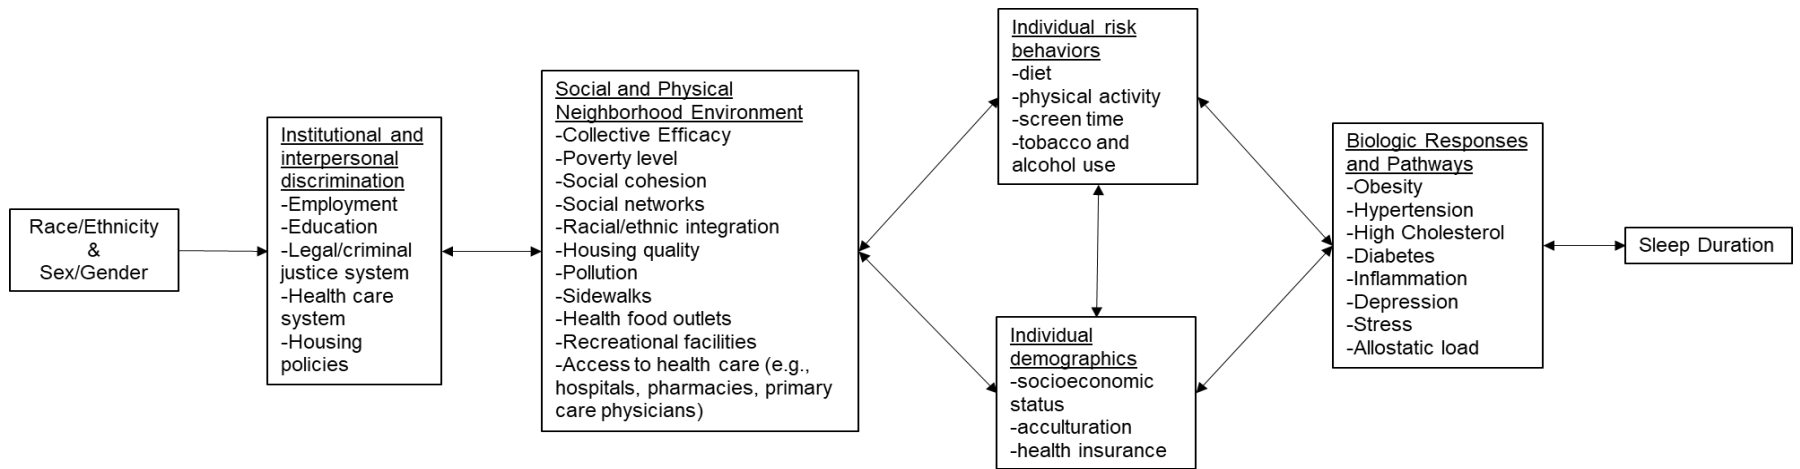

**Web Table 1.** Comparison of Analytical Sample to Excluded Sample from Waves I, III, IV, and V of the National Longitudinal Study of Adolescent to Adult Health, United States, 1994-2018

| Characteristics                             | Analytic Sample<br>(n=12,593) |             | Excluded<br>(n=6,305) |             |
|---------------------------------------------|-------------------------------|-------------|-----------------------|-------------|
|                                             | N                             | %           | N                     | %           |
| <b>Female, n (%)</b>                        | 5,887                         | 46.8        | 3,594                 | 53.4        |
| <b>Race/ethnicity, n (%)</b>                |                               |             |                       |             |
| Black                                       | 3,098                         | 24.6        | 1,571                 | 25.9        |
| Hispanic                                    | 2,428                         | 19.3        | 1,097                 | 18.1        |
| White                                       | 7,067                         | 56.1        | 3,388                 | 55.9        |
| <b>Age in years<sup>a</sup></b>             |                               |             |                       |             |
| Wave I                                      |                               | 15.7 (<0.1) |                       | 15.5 (<0.1) |
| Wave III                                    |                               | 22.0 (1.8)  |                       | 21.8 (1.8)  |
| Wave IV                                     |                               | 28.5 (1.8)  |                       | 28.3 (1.8)  |
| Wave V                                      |                               | 38.1 (1.9)  |                       | 37.8 (1.9)  |
| <b>Highest Parental Education, Wave 1</b>   |                               |             |                       |             |
| < high school                               | 3,646                         | 30.3        | 1,791                 | 31.4        |
| High school graduate                        | 1,585                         | 13.2        | 903                   | 15.8        |
| Some college                                | 2,635                         | 21.9        | 1,202                 | 21.1        |
| College or graduate education               | 4,180                         | 34.7        | 1,804                 | 31.7        |
| <b>Highest Education, Wave 3, n (%)</b>     |                               |             |                       |             |
| < high school                               | 1,343                         | 16.1        | 579                   | 11.0        |
| High school graduate                        | 3,440                         | 41.3        | 1,836                 | 34.8        |
| Some college                                | 2,603                         | 31.2        | 2,009                 | 38.1        |
| College or graduate education               | 952                           | 11.4        | 851                   | 16.1        |
| <b>Highest Education, Wave 4, n (%)</b>     |                               |             |                       |             |
| < high school                               | 2,962                         | 33.2        | 1,411                 | 26.3        |
| High school graduate                        | 3,732                         | 41.8        | 2,119                 | 39.5        |
| Some college                                | 1,622                         | 18.2        | 1,275                 | 23.8        |
| College or graduate education               | 607                           | 6.8         | 562                   | 10.5        |
| <b>Highest Education, Wave 5, n (%)</b>     |                               |             |                       |             |
| < high school                               | 3,037                         | 42.6        | 1,399                 | 34.8        |
| High school graduate                        | 2,717                         | 38.1        | 1,512                 | 37.6        |
| Some college                                | 1,136                         | 15.9        | 866                   | 21.5        |
| College or graduate education               | 242                           | 3.4         | 247                   | 6.1         |
| <b>Depressive Symptoms<sup>a</sup></b>      |                               |             |                       |             |
| Wave I                                      |                               | 11.0 (7.5)  |                       | 11.7 (7.7)  |
| Wave III                                    |                               | 6.2 (3.2)   |                       | 6.6 (3.4)   |
| Wave IV                                     |                               | 7.6 (3.6)   |                       | 8.1 (4.0)   |
| Wave V                                      |                               | 2.3 (2.5)   |                       | 2.5 (2.7)   |
| <b>Body Mass Index in kg/m<sup>2a</sup></b> |                               |             |                       |             |
| Wave I                                      |                               | 22.6 (4.4)  |                       | 22.5 (4.6)  |
| Wave III                                    |                               | 26.5 (6.0)  |                       | 26.3 (6.3)  |

|                                     |       |            |       |            |
|-------------------------------------|-------|------------|-------|------------|
| Wave IV                             |       | 29.3 (7.5) |       | 29.2 (7.7) |
| Wave V                              |       | 30.7 (7.6) |       | 31.1 (8.2) |
| <b>Self-reported Health, Wave 1</b> |       |            |       |            |
| Excellent                           | 3,656 | 29.0       | 1,665 | 27.6       |
| Very Good                           | 5,069 | 40.3       | 2,261 | 37.4       |
| Good                                | 3,026 | 24.0       | 1,651 | 27.3       |
| Fair                                | 772   | 6.1        | 435   | 7.2        |
| Poor                                | 66    | 0.5        | 32    | 0.5        |
| <b>Self-reported Health, Wave 3</b> |       |            |       |            |
| Excellent                           | 2,818 | 33.8       | 1,686 | 31.9       |
| Very Good                           | 3,453 | 41.4       | 2,070 | 39.2       |
| Good                                | 1,746 | 20.9       | 1,232 | 23.3       |
| Fair                                | 304   | 3.6        | 268   | 5.1        |
| Poor                                | 21    | 0.3        | 27    | 0.5        |
| <b>Self-reported Health, Wave 4</b> |       |            |       |            |
| Excellent                           | 1,735 | 19.4       | 1,038 | 19.3       |
| Very Good                           | 3,509 | 39.3       | 1,917 | 35.7       |
| Good                                | 2,887 | 32.4       | 1,833 | 34.2       |
| Fair                                | 714   | 8.0        | 507   | 9.5        |
| Poor                                | 78    | 0.9        | 72    | 1.3        |
| <b>Self-reported Health, Wave 5</b> |       |            |       |            |
| Excellent                           | 1,201 | 16.8       | 649   | 16.1       |
| Very Good                           | 2,666 | 37.4       | 1,379 | 34.3       |
| Good                                | 2,373 | 33.3       | 1,378 | 34.3       |
| Fair                                | 751   | 10.5       | 497   | 12.4       |
| Poor                                | 142   | 2.0)       | 117   | 2.9        |

<sup>a</sup>Values expressed as mean (standard deviation)

**Web Table 2.** Growth Mixture Model Fit Indicators for Short Sleep Duration Trajectories by Race/Ethnicity and Sex/Gender, United States, 1994-2018

| <b>Number of Classes</b> | <b>AIC</b> | <b>BIC</b> | <b>Entropy</b> |
|--------------------------|------------|------------|----------------|
| 2                        | 89591.49   | 89851.93   | 0.80           |
| 3                        | 89184.43   | 89578.80   | 0.86           |
| 4                        | 89184.66   | 89712.96   | 0.83           |

Note: Models were conducted with 5000 starts using an expectation maximization algorithm. The best log likelihood was not replicated for 2- and 4-class models.

**Web Table 3.** Multi-Group Growth Mixture Model Results - Estimated Probabilities Across Developmental Periods for Each Trajectory Type by Race/Ethnicity and Sex/Gender, United States, 1994-2018 (n=12,593)

|                                  | Estimated Probabilities for Each Trajectory Type by Race/ethnicity and Sex |      |     |            |      |     |               |      |     |             |     |     |              |      |     |            |      |     |
|----------------------------------|----------------------------------------------------------------------------|------|-----|------------|------|-----|---------------|------|-----|-------------|-----|-----|--------------|------|-----|------------|------|-----|
|                                  | Black Female                                                               |      |     | Black Male |      |     | Latinx Female |      |     | Latinx Male |     |     | White Female |      |     | White Male |      |     |
|                                  | Type:                                                                      |      |     | Type:      |      |     | Type:         |      |     | Type:       |     |     | Type:        |      |     |            |      |     |
|                                  | C                                                                          | E    | L   | C          | E    | L   | C             | E    | L   | C           | E   | L   | C            | E    | L   | C          | E    | L   |
| Early Adolescence (11-14 years)  | .48                                                                        | 1.00 | 0   | .45        | 1.00 | 0   | .46           | 1.00 | 0   | .44         | .41 | 0   | .45          | 1.00 | 0   | .37        | 1.00 | 0   |
| Adolescent (15-19 years)         | .51                                                                        | 1.00 | 0   | .50        | .93  | 0   | .47           | 1.00 | 0   | .50         | .31 | 0   | .45          | 1.00 | 0   | .41        | 1.00 | 0   |
| Emerging Adulthood (19-24 years) | .54                                                                        | 0    | 0   | .56        | .00  | 0   | .48           | .06  | 0   | .56         | .23 | 0   | .46          | .06  | 0   | .45        | .11  | 0   |
| Young Adulthood (25-34 years)    | .57                                                                        | 0    | 0   | .62        | .00  | 0   | .49           | 0    | 0   | .61         | .16 | 0   | .46          | 0    | 0   | .49        | 0    | 0   |
| Adulthood (35-44 years)          | .60                                                                        | 0    | .42 | .67        | .00  | .33 | .50           | 0    | .29 | .67         | .11 | .88 | .46          | 0    | .23 | .52        | 0    | .17 |

Abbreviations for trajectory type: C = Consistent Increasing Short Sleepers (i.e., increasing probability of short sleep into adulthood); E = Early Onset Short Sleepers (i.e., declining probability of short sleep from adolescence into adulthood); L = Late Onset Short Sleepers (i.e., no probability of short sleep in adolescence, but in adulthood)
